# Supplementary material
Source: Royal Society of Chemistry journal article supplement (doi:10.1039/d6dt00515b)
Supplement: d6dt00515b1.pdf [file d6dt00515b1.pdf]

## Supplementary Information

# Linker-Dependent Nitric Oxide Storage and Release Behavior in Cu-Based Metal–Organic Frameworks

*Do Nam Lee, <sup>a,\*</sup>, Sooji Son, <sup>b</sup> Kihak Gwon, <sup>c</sup> Youngmee Kim, <sup>d</sup> Sung-Jin Kim, <sup>d</sup> Seung Woo Choi, <sup>b</sup> and Jae Ho Shin<sup>b,\*</sup>*

<sup>a</sup> Ingenium College of Liberal Arts (Chemistry), Kwangwoon University, Seoul 01897, Republic of Korea

<sup>b</sup> Department of Chemistry, Kwangwoon University, Seoul 01897, Republic of Korea

<sup>c</sup> Department of Biofibers and Biomaterials Science, Kyungpook National University, Daegu 41566, Republic of Korea

<sup>d</sup> NanoBio-Energy Materials Center and Department of Chemistry and Nano Science, Ewha Womans University, Seoul 03760, Republic of Korea

### \*Corresponding Authors

Jae Ho Shin – Department of Chemistry, Kwangwoon University, Seoul 01897, Republic of Korea; Phone: +82-2-940-5627; Email: [jhshin@kw.ac.kr](mailto:jhshin@kw.ac.kr)

Do Nam Lee – Ingenium College of Liberal Arts (Chemistry), Kwangwoon University, Seoul 01897, Republic of Korea; Phone: +82-2-940-5658; Email: [donamlee@hanmail.net](mailto:donamlee@hanmail.net)

Current address : Do Nam Lee – Donam Nanobio Lab Co., Ltd., Seoul 01886, Republic of Korea; Phone: +82-2-911-4105; Email: [donamlee@hanmail.net](mailto:donamlee@hanmail.net), Seung Woo Choi – C&G High Tech Co., Ltd., Ansong 17554, Republic of Korea.

KEYWORDS. Cu-MOF; Nitric oxide storage and release; Linker engineering; Gas release kinetics; Non-classical hydrogen bonding

## Experimental Details

### Reagents

All chemicals were purchased from commercial suppliers and used without further purification unless otherwise stated.

- $\text{Cu}(\text{NO}_3)_2 \cdot 3\text{H}_2\text{O}$  ( $\geq 99\%$ , Sigma-Aldrich)
- Glutaric acid ( $\geq 99\%$ , Sigma-Aldrich)
- 1,2-bis(4-pyridyl)ethylene ( $\geq 98\%$ , TCI)
- 4,4'-azopyridine ( $\geq 98\%$ , Alfa Aesar)
- N,N-dimethylformamide (DMF, anhydrous,  $\geq 99.8\%$ , Merck)

**Table S1. Crystalline data for Cu-MOF 1 and Cu-MOF 2.**

|                                   | Cu-MOF 1                                                                      |                                                         | Cu-MOF 2                                                                       |                                                         |
|-----------------------------------|-------------------------------------------------------------------------------|---------------------------------------------------------|--------------------------------------------------------------------------------|---------------------------------------------------------|
| Chemical formula                  | C <sub>22</sub> H <sub>22</sub> Cu <sub>2</sub> N <sub>2</sub> O <sub>8</sub> |                                                         | C <sub>20</sub> H <sub>20</sub> Cu <sub>2</sub> N <sub>4</sub> O <sub>10</sub> |                                                         |
| Formula weight                    | 569.49 g/mol                                                                  |                                                         | 603.48 g/mol                                                                   |                                                         |
| Temperature                       | 296(2) K                                                                      |                                                         | 100(2) K                                                                       |                                                         |
| Wavelength                        | 0.71073 Å                                                                     |                                                         | 0.71073 Å                                                                      |                                                         |
| Space group                       | C 2/c                                                                         |                                                         | C 2/c                                                                          |                                                         |
| a                                 | 25.027(14) Å                                                                  |                                                         | 24.697(11) Å                                                                   |                                                         |
| b                                 | 13.234(8) Å                                                                   |                                                         | 13.156(5) Å                                                                    |                                                         |
| c                                 | 8.547(5) Å                                                                    |                                                         | 8.534(3) Å                                                                     |                                                         |
| α                                 | 90°                                                                           |                                                         | 90°                                                                            |                                                         |
| β                                 | 91.708(5)°                                                                    |                                                         | 93.86(3)°                                                                      |                                                         |
| γ                                 | 90°                                                                           |                                                         | 90°                                                                            |                                                         |
| Volume                            | 2829.(3) Å <sup>3</sup>                                                       |                                                         | 2766.5(18) Å <sup>3</sup>                                                      |                                                         |
| Density (calc.)                   | 1.337 g/cm <sup>3</sup>                                                       |                                                         | 1.449 g/cm <sup>3</sup>                                                        |                                                         |
| Reflections collected             | 19188                                                                         |                                                         | 45135                                                                          |                                                         |
| Independent reflections           | 3654 [R(int) = 0.0866]                                                        |                                                         | 3514 [R(int) = 0.0635]                                                         |                                                         |
| Goodness-of-fit on F <sup>2</sup> | 0.932                                                                         |                                                         | 1.079                                                                          |                                                         |
| Final R indices                   | 2514 data;<br>I>2σ(I)                                                         | R <sub>1</sub> = 0.0422,<br>wR <sub>2</sub> =<br>0.0857 | 2664 data;<br>I>2σ(I)                                                          | R <sub>1</sub> = 0.0549,<br>wR <sub>2</sub> = 0.1536    |
|                                   | all data                                                                      | R <sub>1</sub> = 0.0697,<br>wR <sub>2</sub> =<br>0.0933 | all data                                                                       | R <sub>1</sub> = 0.0783,<br>wR <sub>2</sub> =<br>0.1720 |
| Largest diff. peak and hole       | 0.456 and -0.572 eÅ <sup>-3</sup>                                             |                                                         | 1.668 and -0.588 eÅ <sup>-3</sup>                                              |                                                         |

## Nitric Oxide Loading and Releasing Studies

For the dehydration process, 10 mg of Cu-MOF 1 or 2 was dehydrated in a vacuum at 150 °C for 24 h, and stored sealed. The activated Cu-MOF was placed in a 40 mL vial, and the vial was placed in a Parr bottle (200 mL) that was connected to an in-house NO reactor. The reactor was flushed with Ar gas (99.99%) thrice for 10 min each to remove oxygen before charging NO. The reaction bottle was then charged under 10 atm of NO using ultrapure grade (99.5%) NO gas provided by Dong-A Specialty Gases (Seoul, Korea), which was purified over KOH pellets to remove trace NO degradation products. The bottle was then sealed for 72 h at 25 C. Prior to removing the NO-charged Cu-MOFs, unreacted NO was purged from the chamber with Ar thrice. The NO-Cu-MOFs were stored in a sealed container at -20 °C until further use.

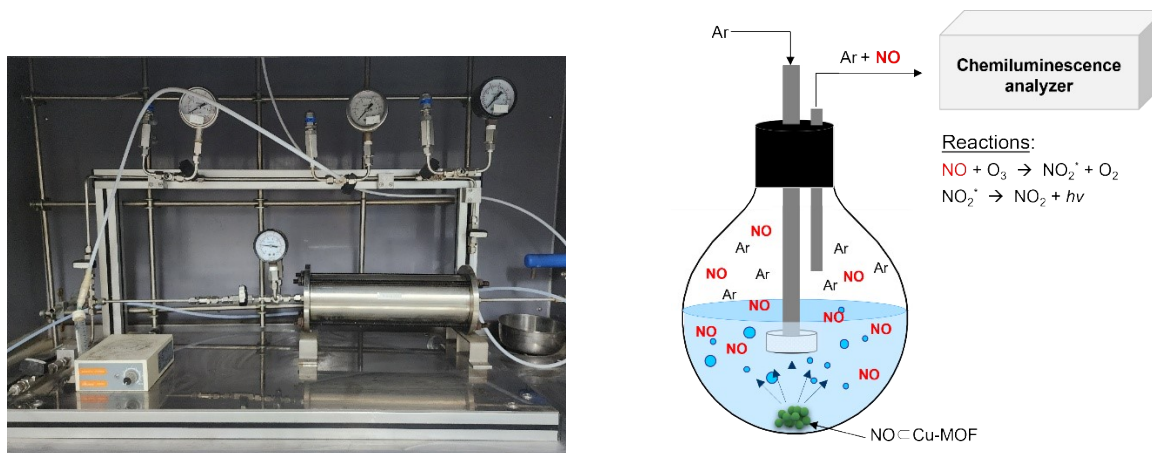

**Figure S1.** In-house NO reactor for NO loading and Apparatus for NO release measurement.

The NO release profiles of NO-Cu-MOFs were monitored in deoxygenated phosphate-buffered saline (PBS; 0.01 M, pH 7.4) at 37 °C using a Sievers 280i chemiluminescence NO analyzer (Boulder, CO, USA). NO released from 5 mg of NO-Cu-MOF in 50 mL of PBS (0.01 M, pH 7.4 at 37 °C) was transported to the analyzer by a stream of Ar gas (70 mL · min<sup>-1</sup>) passed

through the reaction cell. The instrument was calibrated with air passed through a zero filter (0 ppm NO) and a 45 ppm NO gas standard (balanced with N<sub>2</sub>; Dong-Woo Gas Tech, Siheung, Korea). The total amount of NO released,  $t[\text{NO}]$ ; maximum flux of NO release,  $[\text{NO}]_m$ ; half-life of NO release,  $t_{1/2}$ ; time necessary to reach  $[\text{NO}]_m$ ,  $t_m$ ; and duration time of NO release for sustained fluxes of  $\text{NO} \geq 1.0 \text{ ppb} \cdot \text{mg}^{-1}$ ,  $t_d$ , were determined for the evaluation of NO-Cu-MOFs.
